# Supplementary material
Source: Springer Nature journal article supplement (https://www.springermedizin.de/resource/supplementary/12916_2006_91_MOESM4_ESM.pdf/9599156)
Supplement: MOESM4 [file 9599156]

negative control  
control  
green tea 4%  
green tea 0.4%  
green tea 0.04%  
green tea 0.004%  
green tea 0.0004%  
green tea 0.00004%

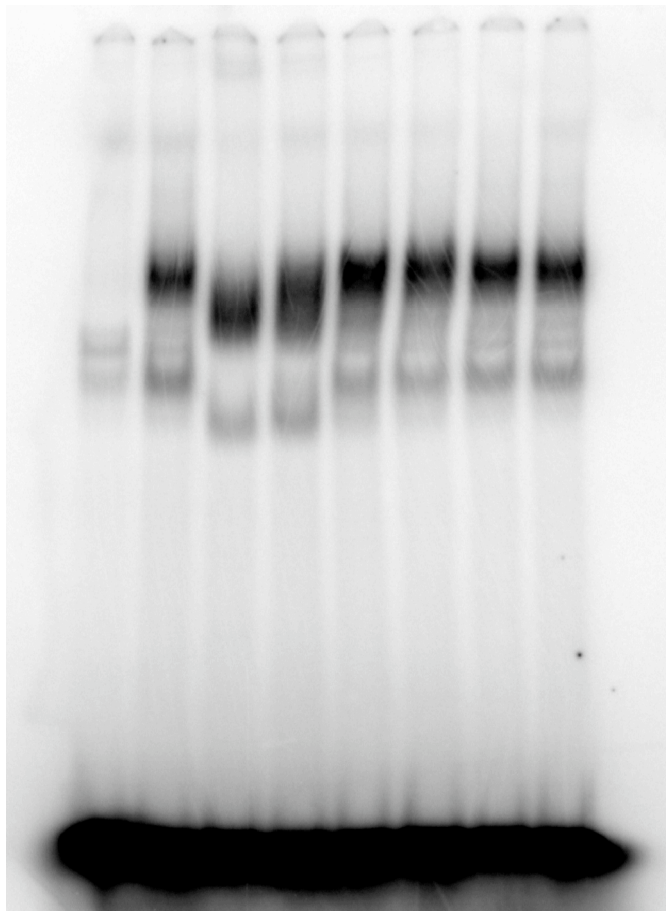

← NF-kB

← n.s.

← free oligonucleotide
